# Supplementary material for: Adsorption of bovine serum albumin on gold nanoprisms: interaction and effect of NIR irradiation on protein corona
Source: Royal Society of Chemistry journal article supplement (doi:10.1039/d0tb01246g), 2020-01-01
Supplement: d0tb01246g1.pdf [file d0tb01246g1.pdf]

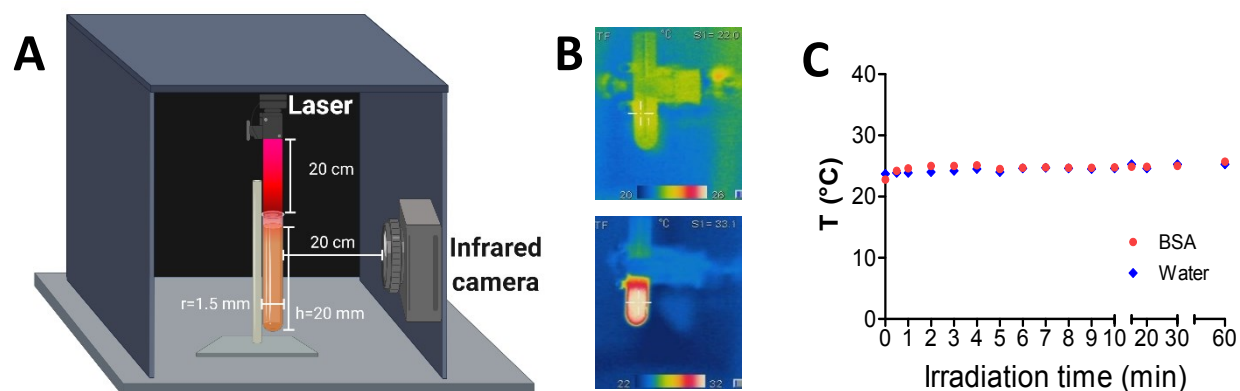

Supplementary 1. A. Description of the Irradiation system, laser output 0,350 W,  $\phi=3.5$  mm,  $\lambda=808$  nm. B. captured images of the infrared camera used for the temperature monitoring. C. Temperature increase of water and a BSA solution as blank control of irradiation, showing an insignificant temperature increase.

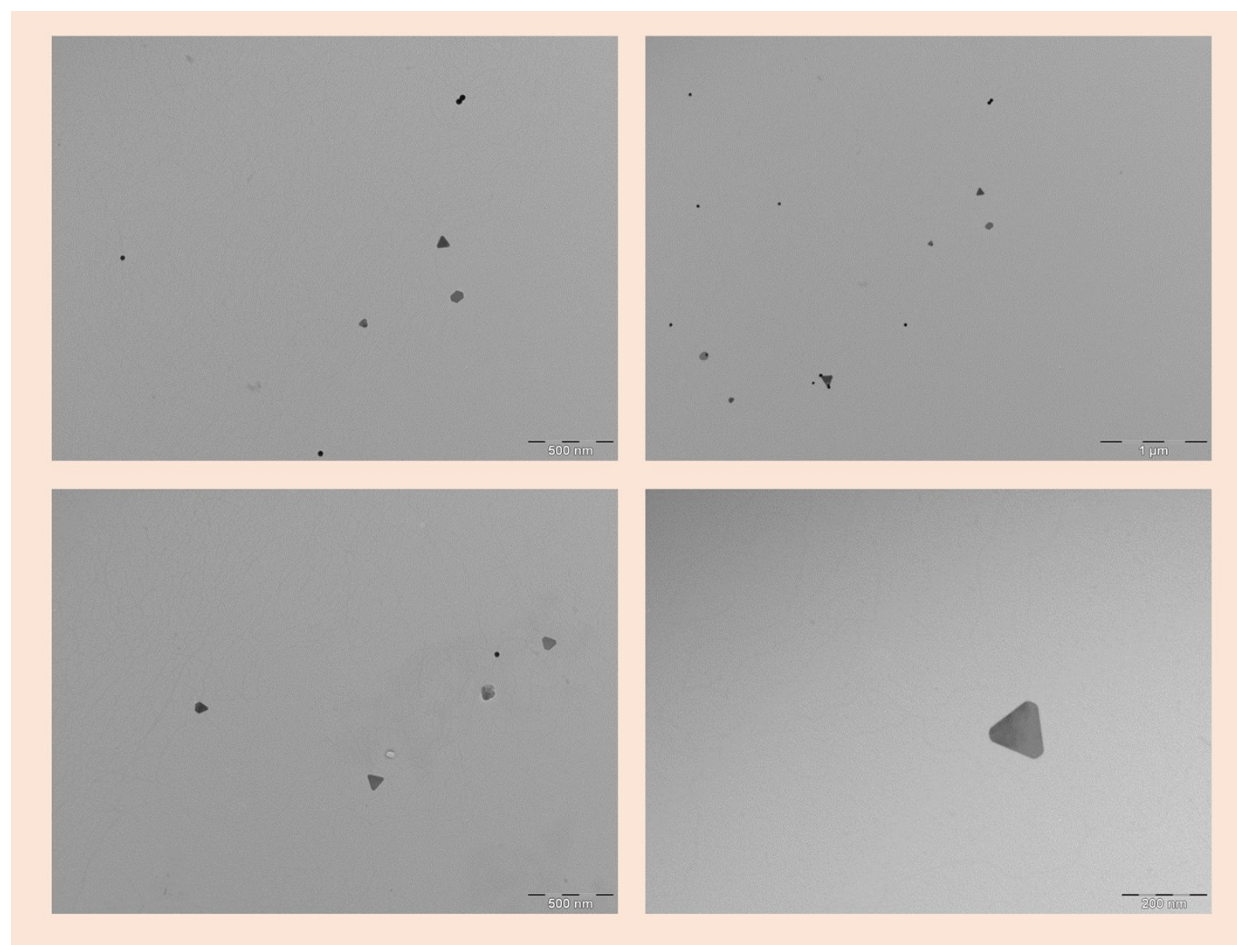

Supplementary 2. TEM images of AuNPrs after purification by centrifugation.

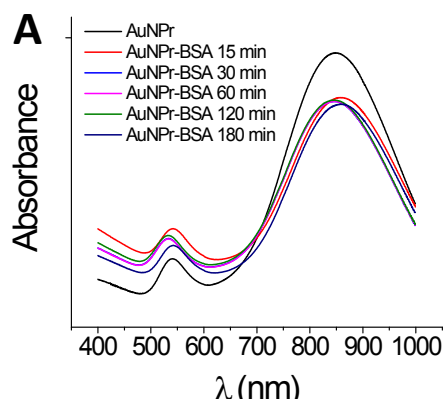

**B**

|           | PDI | Pk 1 Mean<br>Int | Pk 2<br>Mean Int | Z potential<br>(mV) |
|-----------|-----|------------------|------------------|---------------------|
| AuNPrs    | 0,4 | 80±6             | 7±1              | -27±0,2             |
| AuNPr-BSA | 0,4 | 93±12            | 11±1             | -18±3               |

Supplementary 3. A. Uv-Vis spectrum of AuNPrs after interaction with BSA ( $[AuNPr] = 1 \text{ nmol L}^{-1}$   $[BSA] = 1000 \text{ mg L}^{-1}$ ) over time. B Hydrodynamic diameters and Z potential before and after protein corona formation.

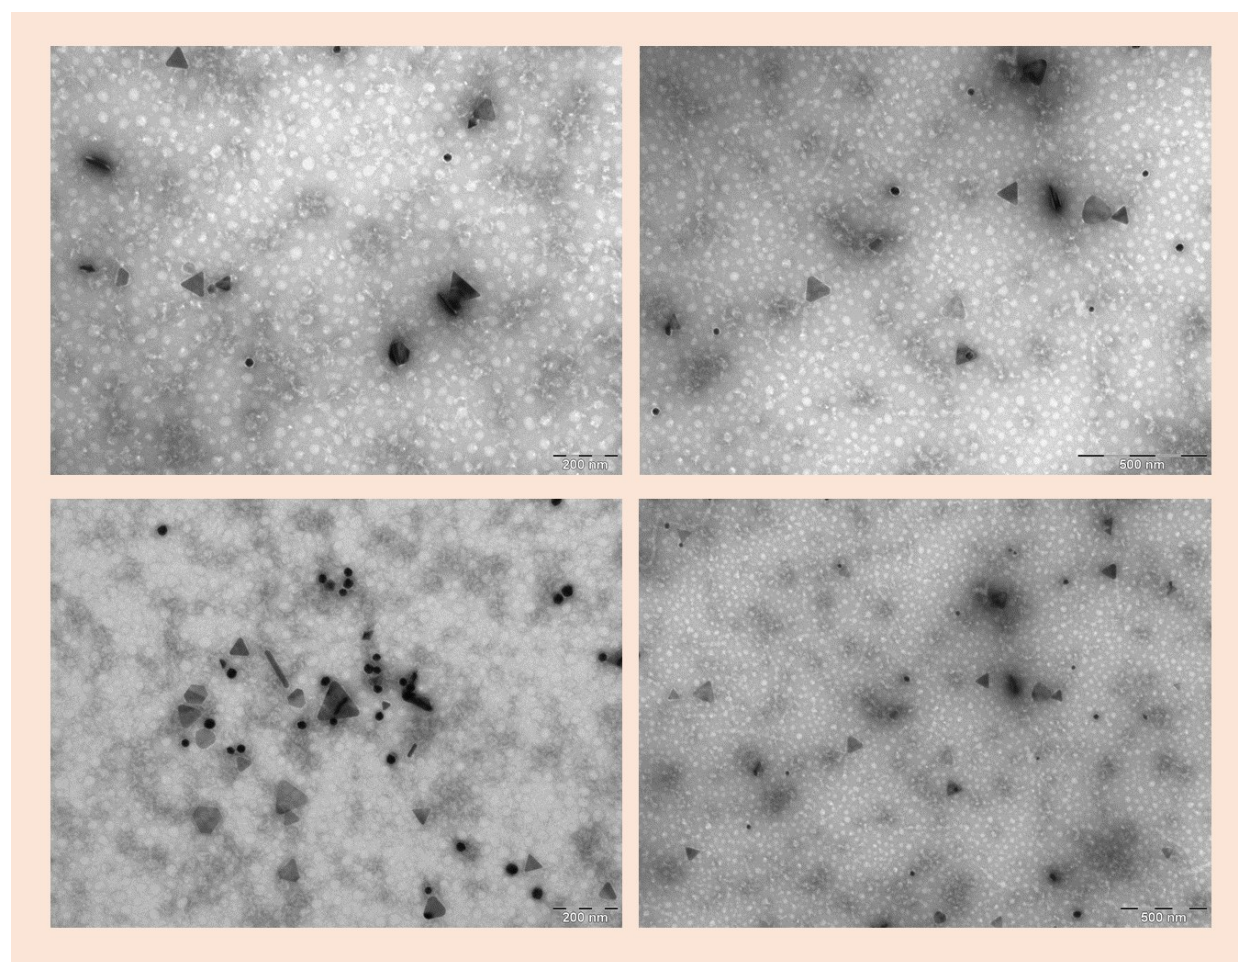

Supplementary 4. TEM images of AuNPrs after BSA coating.

| Linear form                                                                                                                                                                                                                                                                                                                                      | Plot                                                                                                                         |
|--------------------------------------------------------------------------------------------------------------------------------------------------------------------------------------------------------------------------------------------------------------------------------------------------------------------------------------------------|------------------------------------------------------------------------------------------------------------------------------|
| <b>Freundlich isotherm</b><br>$\text{Log } q_e = \frac{1}{n} \log C_e + \log K_F$                                                                                                                                                                                                                                                                | Log $C_e$ vs log $q_e$                                                                                                       |
| <b>Langmuir isotherms</b><br>Type I : $\frac{C_e}{q_e} = \frac{1}{q_m} \left( \frac{1}{K_L} \right) + \frac{C_e}{q_m}$<br>Type II : $\frac{1}{q_e} = \frac{1}{q_m} + \left( \frac{1}{q_m K_L} \right) \frac{1}{C_e}$<br>Type III : $q_e = q_m - \left( \frac{1}{K_L} \right) \frac{q_e}{C_e}$<br>Type IV : $\frac{q_e}{C_e} = K_L q_m - K_L q_e$ | $C_e$ vs $\frac{C_e}{q_e}$<br>$\frac{1}{C_e}$ vs $\frac{1}{q_e}$<br>$\frac{q_e}{C_e}$ vs $q_e$<br>$q_e$ vs $\frac{q_e}{C_e}$ |
| <b>Kinetic models</b><br>Pseudo 1 <sup>st</sup> order: $\ln(q_e - q_t) = \ln(q_e) - k_1(t)$<br>Pseudo 2 <sup>nd</sup> order: $\frac{t}{q_t} = \frac{t}{q_e} + \frac{1}{K_2 q_e^2}$                                                                                                                                                               | Time vs $(q_e - q_t)$<br>Time vs $\frac{t}{q_t}$                                                                             |

Supplementary 5. Langmuir and Freundlich isotherms and kinetic models linear equations.  $C_e$  represents the BSA concentration at equilibrium,  $q_m$  is the number of moles of BSA required to form a monolayer on one gram of AuNPs,  $q_e$  is the adsorption capacity,  $t$  is the time,  $K_F$  and  $K_L$  are the Freundlich and Langmuir constants, respectively.  $K_1$ ,  $k_2$  and  $k_1$  are the pseudo first and second order kinetic constants.

## Supplementary 6. Calculation of the type of adsorption and surface area of AuNPrs

A characteristic dimensionless constant is proposed for Langmuir isotherms, in order to examine the progression of adsorption, namely  $R_L$ , which is indicative of the type of adsorption of BSA on AuNPrs. For a favored adsorption process  $0 < R_L < 1$ ; for unfavored adsorption  $R_L > 1$ ; for linear adsorption  $R_L = 1$  and reversible adsorption  $R_L = 0$ .<sup>1,2</sup>  $R_L$  was calculated as follows:

$$R_L = \frac{1}{1 + K_L C_0} \quad (1)$$

Where  $C_0$  is the concentration of BSA at time 0 (1000 mg/L), and  $K_L$  is the Langmuir constant. For this study,  $K_L$  was calculated as  $8.8 \times 10^{-4} \text{ L mg}^{-1}$ ; hence, the  $R_L$  value is 0.5, suggesting favored adsorption process of BSA on AuNPrs.<sup>15</sup> Additionally, essential parameters such as surface area ( $S_{NPr}$ ) and monolayer saturation capacity  $q_m$  (i.e., the BSA maximum mass present in a monolayer upon AuNPrs) was calculated from the Langmuir adsorption model. The specific surface area in  $\text{m}^2 \text{ g}^{-1}$  of AuNPrs is calculated as follows:<sup>3</sup>

$$S_{NPr} = \frac{q_m \times a_{BSA} \times N_A \times 10^{-21}}{M} \quad (2)$$

Where  $q_m$  is the mass of BSA adsorbed in a monolayer, calculated as the inverse of the slope for Langmuir linear regression in figure 5,  $q_m = 47.6 \text{ mg g}^{-1}$ ,  $a_{BSA}$  is the occupied surface area of one molecule of BSA =  $56 \text{ nm}^2$ ,<sup>4</sup>  $N_A$  is the number of Avogadro  $6.022 \times 10^{23} \text{ mol}^{-1}$ , and  $M$  is the molecular weight of BSA =  $66463 \text{ g mol}^{-1}$ . By replacing the values in the equation, a surface area of  $24.2 \text{ m}^2 \text{ g}^{-1}$  was estimated.

## Supplementary 7. Theoretical estimation of the occupation density of BSA on AuNPrs

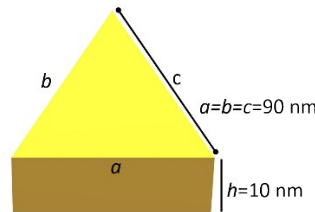

For AuNPrs of 90 nm edge length, the surface area was calculated as the sum of the two triangular and the three rectangular faces,  $A_T$  and  $A_R$  as follows:

$$A_T = 2 \times c^2 \frac{\sqrt{3}}{4} = 7015 \text{ nm}^2 \quad A_R = (a + b + c) \times h = 2700 \text{ nm}^2$$

And the total calculated surface area of AuNPr is  $9715 \text{ nm}^2$ . In addition, BSA dimensions are  $14 \times 4 \times 4 \text{ nm}$ , as it is presented in the supplementary 11 and reported in the literature<sup>4</sup>. BSA can be attached to the gold surface and aligned in side-on or end-on arrange, as it is presented in figure 11 a and b, respectively. In the scenario a, BSA occupied area is  $54 \text{ nm}^2$ , resulting in a maximal density of 180 BSA/AuNPr; meanwhile, in the case of end-on arrange, a BSA molecule occupies  $16 \text{ nm}^2$ , thus, the maximal density is 607 BSA/AuNPr in the first layer, without considering unfolding of the protein.

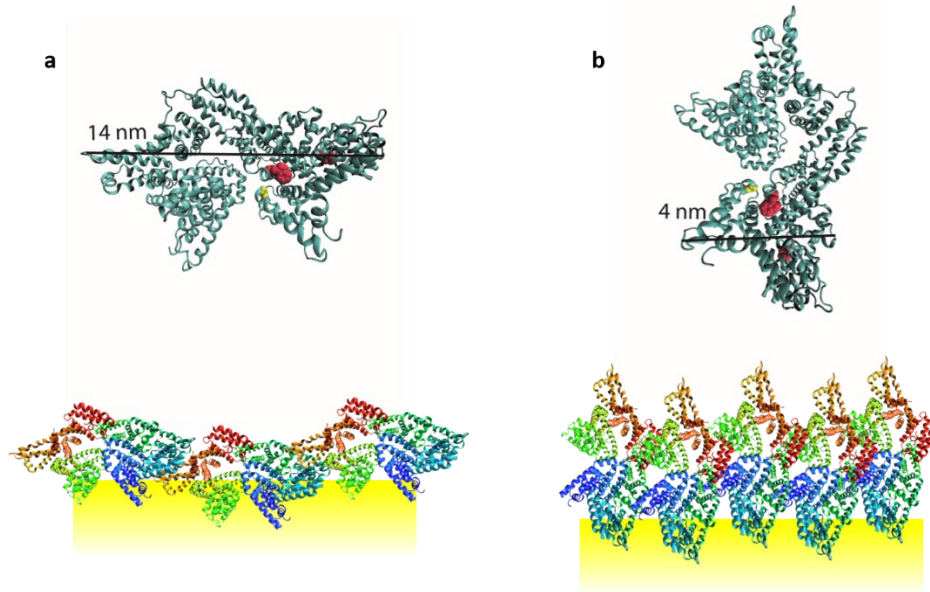

Supplementary 8. BSA size in nm and arrangement. A. aligned in side-on or b. end-on arrange

### Supplementary 9. Calculation of thermodynamic parameters

As Maleki *et al.* proposed,<sup>5</sup> for the adsorption process in equilibrium, the thermodynamic equilibrium constant of adsorption was defined as:

$$K_0 = \frac{q_e}{C_e} \quad (3)$$

Where  $q_e$  and  $C_e$  are, the amount of BSA adsorbed at equilibrium time and the equilibrium constant, respectively. A linear plot between  $q_e$  and  $\ln(q_e/C_e)$  has the value of  $\ln K_0$  as a vertical axis intercept (figure 7).

The Standard thermodynamic parameters,  $\Delta G^0$ ,  $\Delta H^0$  y  $\Delta S^0$ , for the adsorption processes were defined as follows:<sup>6,7</sup>

$$\Delta G^0 = -RT \ln K_0 \quad (4)$$

$$RT \ln K_0 = T\Delta S^0 - \Delta H^0 \quad (5)$$

$$\ln K_0 = -\frac{\Delta H^0}{R} \frac{1}{T} - \frac{\Delta S^0}{R} \quad (6)$$

The activation energy of the adsorption process can be calculated using the Arrhenius equation:<sup>8</sup>

$$\ln k_2 = \ln A - \frac{E_a}{RT}$$

Where  $k_2$  is the pseudo-second-order rate constant (as it was described in adsorption kinetic parameters section),  $A$  is the Arrhenius factor,  $E_a$  the activation energy, and  $R$  the ideal gas constant (8.314 J/mol K).  $E_a$  is calculated by plotting  $\ln k_2$  vs.  $1/T$  (figure 7).

The calculated values for the thermodynamic properties are presented in the following table:

Table 9.1. Values of thermodynamic parameters for the adsorption of BSA on AuNPrs

| Temperature (K) | $\Delta G^\circ$ (Jmol <sup>-1</sup> ) | $\Delta H^\circ$ (KJmol <sup>-1</sup> ) | $\Delta S^\circ$ (Jmol <sup>-1</sup> K <sup>-1</sup> ) | $E_a$ (kJmol <sup>-1</sup> ) |
|-----------------|----------------------------------------|-----------------------------------------|--------------------------------------------------------|------------------------------|
| 298             | -3995.1 ± 396                          | -95.4 ± 21                              | -306.0 ± 69                                            | 45.7 ± 4                     |
| 305             | -2524.9 ± 228                          |                                         |                                                        |                              |
| 310             | -212.4 ± 21                            |                                         |                                                        |                              |

## Supplementary 10. Relative fluorescence change

Relative fluorescence change ( $Q=(F_o-F)/F$ ) is an intrinsic property of the systems and determined for the number of binding sites in the protein.<sup>11,12</sup> The relationship between relative fluorescence and AuNPrs concentration, provide information about the number of binding sites in the protein, as well as the binding constant between AuNPs and BSA, from the Hill equation<sup>13</sup>:

$$\log\left(\frac{F_o-F}{F}\right) = n * \log[AuNP] + \log K$$

Where  $F_o$  and  $F$  are the fluorescence before and after the addition of AuNPrs,  $n$  is the Hill coefficient,  $[AuNPr]$  is the concentration of the AuNPr added, and  $K$  is the binding constant. By plotting  $\log[(F_o-F)/F]$  vs.  $\log[AuNP]$ ,  $n$  can be calculated as the slope of the following linear regression:

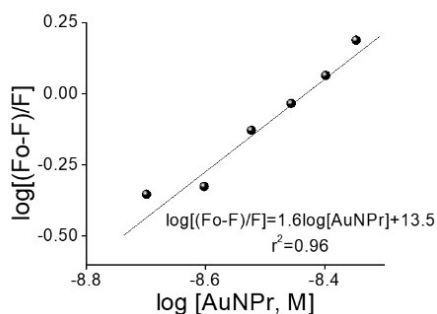

Supplementary 11. Logarithmic graph of relative fluorescence change after increasing concentrations of AuNPrs, from Stern-Volmer relationship

Hill coefficients are a measurement of cooperative binding and were calculated as  $1.6 \pm 0.2$  for AuNPrs. The predominant process is cooperativity binding, i.e., the binding of one BSA molecule on the AuNPrs surface increases the binding affinity of a second one at other sites of the receptor (AuNPrs).<sup>14</sup>



## Supplementary 12

Using the data from the temperature increase profile over time upon laser irradiation (figure 11), the photothermal transduction efficiency,  $\eta_T$ , may be determined as follows:<sup>9</sup>

$$\eta_T = \frac{hA(T_{max} - T_{room}) - Q_0}{I(1 - 10^{A_\lambda})} * 100 \quad (7)$$

Where: h is the heat transfer coefficient; A is the cuvette surface area ( $4.36 \cdot 10^{-5} \text{ m}^2$ );  $T_{max}$  and  $T_{room}$  corresponds to the highest temperature reached by every system and the room temperature, respectively;  $Q_0$  is the energy contribution of the blank, calculated illuminating the system without AuNPrs<sup>10</sup> ( $5.4 \cdot 10^{-4} \text{ W}$ , Supplementary 1); I is the intensity output of the laser (0.35 W), and  $A_\lambda$  is the absorbance of each nanoparticle's solution at 808 nm.

For the determination of h, is applied the mass balance proposed by Roper *et al.*<sup>9</sup> First, a dimensionless driving force temperature,  $\theta$ , is introduced, scaled using the maximum system temperature:

$$\theta = \frac{(T_{room} - T)}{(T_{room} - T_{max})} \quad (8)$$

A sample system time constant  $\tau_s$  is assigned in the mass balance:

$$\tau_s = \frac{\sum_i m_i C_{p,i}}{hA} \quad (9)$$

Therefore, these two parameters ( $\theta$  and  $\tau_s$ ), are related by the following equation:

$$\theta = e^{\left(\frac{-\theta}{\tau_s}\right)} \quad (10)$$

Equation 10 can be solved by a linear regression of  $\ln(1-\theta)$  vs. time, where  $\tau_s = -1/\text{slope}$  of every linear equation (supplementary 8). After  $\tau_s$  determination for each system, equation 9 solves for h, and the results are introduced in equation 7, for the determination of  $\eta_T$ . We have chosen the first five minutes for the linear regression of AuNPrs samples because it is the time of the more drastic temperature increase. Calculated photothermal efficiency of light to heat conversion on AuNPrs is  $\eta_T=32\%$ ; meanwhile, for AuNPrs-BSA is  $\eta_T=25\%$ .

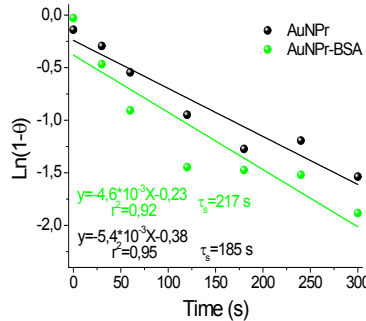

Supplementary 13. Calculation of  $\tau_s$  for photothermal efficiency after NIR irradiation in continuous laser. Line regression of  $\ln(1-\theta)$  vs time: AuNPr-PEG (black) and AuNPr-BSA (green).

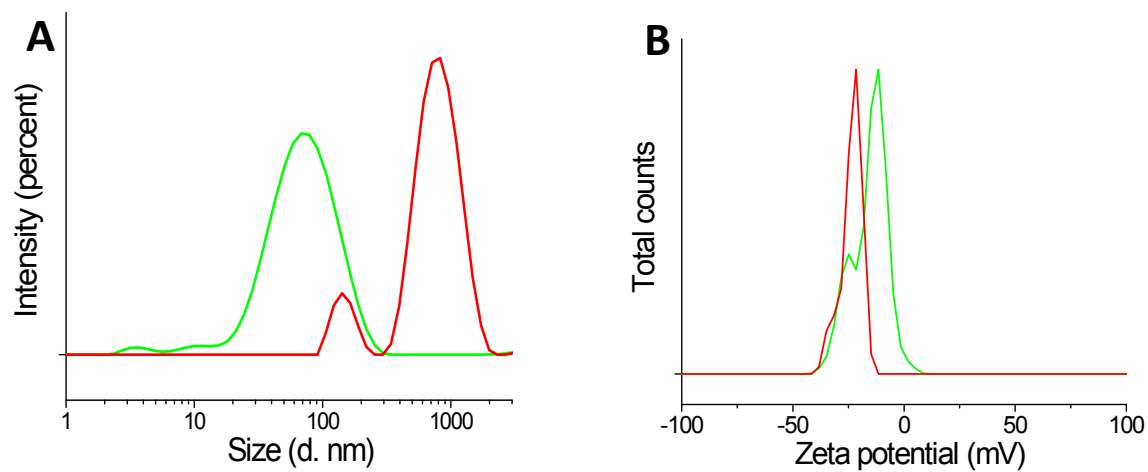

| <b>C</b>      | Pk 1     | Pk 2 Mean | Z potential |
|---------------|----------|-----------|-------------|
|               | Mean Int | Int       | (mV)        |
| AuNPrs-BSA    | 93±12    | 11±1      | -18±3       |
| AuNPr-BSA+NIR | 894±20   | 120±5     | -11±3       |

Supplementary 14. Aggregation effects after 15 min of 808 nm and 350 mW irradiation on: A. Hydrodynamic diameters and B. Z potential. C. summary of the results. Green line AuNPrs-BSA, red line AuNPrs-BSA after NIR irradiation



## References:

- 1 S. Rahdar, A. Rahdar, S. Ahmadi and J. F. Trant, *Can. J. Chem.*, 2019, **97**, 577–583.
- 2 A. Mittal, L. Kurup and J. Mittal, *J. Hazard. Mater.*, 2007, **146**, 243–248.
- 3 A. Itodo, H. Itodo and M. Gafar, *J. Appl. Sci. Environ. Manag.*, 2011, **14**, 1–5.
- 4 H. T. M. Phan, S. Bartelt-Hunt, K. B. Rodenhausen, M. Schubert and J. C. Bartz, *PLoS One*, 2015, **10**, e0141282.
- 5 M. S. Maleki, O. Moradi and S. Tahmasebi, *Arab. J. Chem.*, 2017, **10**, 491–502.
- 6 R. T. M. Dharmendirakumar, G. Vijayakumar, G. Vijayakumar, R. Tamilarasan and M. Dharmendirakumar, *J. Mater. Environ. Sci.*, 2015, **3**, 157–170.
- 7 I. P. Mosiagin, A. D. Furasova, M. A. Kozlova, M. G. Osmolowsky and O. M. Osmolovskaya, *Russ. J. Gen. Chem.*, 2015, **85**, 2654–2656.
- 8 M. H. Çalimli, Ö. Demirbaş, A. Aygün, M. H. Alma, M. S. Nas and F. Şen, *Appl. Water Sci.*, 2018, **8**, 1–12.
- 9 D. K. Roper, W. Ahn and M. Hoepfner, *J. Phys. Chem. C*, 2007, **111**, 3636–3641.
- 10 M. Almada, B. H. Leal-martínez, N. Hassan, M. J. Kogan, M. G. Burboa, A. Topete, M. A. Valdez and J. Juárez, *Mater. Sci. Eng. C*, 2017, **77**, 583–593.
- 11 P. B. Kandagal, S. Ashoka, J. Seetharamappa, S. M. T. Shaikh, Y. Jadegoud and O. B. Ijare, *J. Pharm. Biomed. Anal.*, 2006, **41**, 393–399.
- 12 A. G. Kozlov, R. Galletto and T. M. Lohman, *NIH Public Access*, 2012, **922**, 55–83.
- 13 S. P. Boulos, T. A. Davis, J. A. Yang, S. E. Lohse, A. M. Alkilany, L. A. Holland and C. J. Murphy, *Langmuir*, 2013, **29**, 14984–14996.
- 14 J. Mariam, S. Sivakami and P. M. Dongre, *J. Biomol. Struct. Dyn.*, 2017, **35**, 368–379.
